# Supplementary material for: Sex and prior exposure jointly shape innate immune responses to a live herpesvirus vaccine
Source: eLife. 2023 Jan 17;12:e80652. doi: 10.7554/eLife.80652 (PMC9844983; doi:10.7554/eLife.80652)
Supplement: Supplementary file 1. — (A) Four parallel 10-color staining panels used for high parameter flow cytometry analysis. (B) Seventy subsets of PBMCs detected by high parameter flow cytometry analysis. (C) The 20 most significantly upregulated genes at day 1 compared to day 0 when analyzing all HSV529 recipients. Genes marked in red are IFN-stimulated genes, and those in blue are Fc receptors. (D) The 20 most significantly changing cell populations at day 1 compared to day 0 when analyzing all HSV529 recipients. Red indicates NK cells, blue indicates Th1 cells, green indicates cytolytic cells and yellow indicates plasmablasts. (E) Significantly changing cell populations in HSV529 recipients based on HSV serogroup, when analyzing differences from days 0 to 1. (F) Significantly changing cell populations in HSV529 recipients based on HSV serogroup, when analyzing differences from days 0 to 7. [file elife-80652-supp1.xlsx]

## Sheet: Supplementary File 1A
			HIPc-10c
			T lineage		B lineage	Myeloid lineage
Excitation wavelength	Fluorochrome	PMT name	Treg	T helper	B cell	DC/Mono/NK
355 nm	BUV395	V450	CD45	CD45	CD45	CD45
			HI30	HI30	HI30	HI30
	UV450	V545	Viability	Viability	Viability	Viability
407 nm	V450	V605	CD3	CD3	CD3	CD14
			UCHT1	UCHT1	UCHT1	MFP9
	V500	V655	HLA-DR	HLA-DR	IgD	HLA-DR
			G46-6	G46-6	IA6-2	G46-6
488 nm	FITC/BB515	B515	CD39	CXCR5	CD10	CD163
			Tu66	RF8B2	HI10a	GHI/61
	PerCP-Cy5.5	B710	CD4	CD4	CD19	CD123
			SK3	SK3	SJ25C1	7G3
532 nm	PE	G560	CD25	CXCR3	CD24	CD56
			2A3	1C6	ML5	B159
	PE-Cy7	G780	CCR4	CCR6	CD27	CD11c
			1G1	11A9	M-T271	B-Ly6
633 nm	APC/Alexa Fluor 647	R660	CD127	CD38	CD38	CD16
			hIL-7R-M21	HIT2	HIT2	B73.1
	APC-H7	R780	CD45-RO	CD8	CD20	CD3+CD19+CD20+
			UCHL1	SK1	2H7	SK7+SJ25C1+2H7

## Sheet: Supplementary File 1B
	Gate number	Gate 1	Gate 2	Gate 3	Gate 4	Gate 5	Gate 6	Gate 7	Gate 8	Parent population for expressing frequency of defined population	Subset name
Treg	1.3	CD45	singlets	Live	LYM	CD3				LYM	CD3 T-cells
	32	CD45	singlets	Live	LYM	CD3	CD4+			CD3	CD3/CD4 cells
	33	CD45	singlets	Live	LYM	CD3	CD4+	CD39+ HLA-DR+		CD4+	Activated T-helper (CD39+ HLA-DR+)
	34	CD45	singlets	Live	LYM	CD3	CD4+	HLA-DR+		CD4+	Activated T-helper (HLA-DR+)
	35	CD45	singlets	Live	LYM	CD3	CD4+	CD39+ CD25+		CD4+	Activated T-helper (CD39+ CD25+)
	36	CD45	singlets	Live	LYM	CD3	CD4+	CD25high CD127low		CD4+	Treg
	37	CD45	singlets	Live	LYM	CD3	CD4+	CD25high CD127low	CD45RO+	CD25high CD127low	Memory Treg
	38	CD45	singlets	Live	LYM	CD3	CD4+	CD25high CD127low	CD45RO-	CD25high CD127low	Naïve Treg
	39	CD45	singlets	Live	LYM	CD3	CD4+	CD25high CD127low	CCR4+ CD45RO+ HLA-DR+	CD25high CD127low	Activated Memory Treg (HLA-DR+)
	40	CD45	singlets	Live	LYM	CD3	CD4+	CD25high CD127low	CCR4+CD45RO-HLA-DR+	CD25high CD127low	Activated Naïve Treg (HLA-DR+)
B-cell	LYM	CD45	singlets	Live	LYM					Live MNC
	MON	CD45	singlets	Live	MON					Live MNC
	41	CD45	singlets	Live	LYM	CD19+				LYM	B-cells, total (CD19+)
	42	CD45	singlets	Live	LYM	CD20+				LYM	B-cells, total (CD20+)
	43	CD45	singlets	Live	LYM	CD19+ CD20+				LYM	B-cells, total (CD19+ CD20+)
	44.1	CD45	singlets	Live	LYM	CD19+ CD20+	CD24high CD38high			CD19+ CD20+	B-cells, transitional (CD24hi CD38hi)
	44.2	CD45	singlets	Live	LYM	CD19+ CD20+	CD10+ CD27low			CD19+ CD20+	B-cells, transitional (CD10+ CD27lo)
	44.3	CD45	singlets	Live	LYM	CD19+ CD20+	CD10+ CD24high			CD19+ CD20+	B-cells, transitional (CD10+ CD24hi)
	45	CD45	singlets	Live	LYM	CD19+ CD20+	CD27- IgD+			CD19+ CD20+	B-cells, naïve (IgD+)
	46	CD45	singlets	Live	LYM	CD19+ CD20+	CD27- IgD-			CD19+ CD20+	B-cells, naïve (IgD-)
	47	CD45	singlets	Live	LYM	CD19+ CD20+	CD27+ IgD+			CD19+ CD20+	B-cells, memory (igD+)
	48	CD45	singlets	Live	LYM	CD19+ CD20+	CD27+ IgD-			CD19+ CD20+	B-cells, memory (IgD-)
	49	CD45	singlets	Live	LYM	CD19+ CD20+	CD38high CD27- IgD+			CD19+ CD20+	Activated IgD+ naïve B-cells (CD38hi)
	50	CD45	singlets	Live	LYM	CD19+ CD20+	CD38high CD27- IgD-			CD19+ CD20+	Activated IgD- naïve B-cells (CD38hi)
	51	CD45	singlets	Live	LYM	CD19+ CD20+	CD38high CD27+ IgD+			CD19+ CD20+	Activated IgD+ memory B-cells (CD38hi)
	52	CD45	singlets	Live	LYM	CD19+ CD20+	CD38high CD27+ IgD-			CD19+ CD20+	Activated IgD- memory B-cells (CD38hi)
	53	CD45	singlets	Live	LYM	CD19+ CD20-				LYM	CD20- B-cells
	54.1	CD45	singlets	Live	LYM	CD19+ CD20-	CD27high CD38high			CD19+	Plasmablasts (CD27hi CD38hi), % of CD19+ B-cells
	54.2	CD45	singlets	Live	LYM	CD19+ CD20-	CD27high CD38high			CD19+ CD20-	Plasmablasts (CD27hi CD38hi), % of CD19+ CD20- B-cells
	69	CD45	singlets	Live	LYM	CD19+ CD20+	CD38high			CD19+ CD20+	B-cells, CD38high
DCMonoNK	55	CD45	singlets	Live	MON					Live MNC	monocytes
	56	CD45	singlets	Live	CD14+ Lineage-	CD14+ CD16-				CD14+ Lineage-	Classical monocytes
	57	CD45	singlets	Live	CD14+ Lineage-	CD14dim CD16+				CD14+ Lineage-	non-Classical monocytes
	59	CD45	singlets	Live	non-B non-T	CD16+ CD56-				non-B non-T	NK cells (CD16+ CD56-)
	60	CD45	singlets	Live	non-B non-T	CD16+ CD56+				non-B non-T	NK cells (CD16+ CD56+)
	61	CD45	singlets	Live	non-B non-T	CD16- CD56+				non-B non-T	NK cells (CD16- CD56+)
	62	CD45	singlets	Live	non-B non-T	HLA-DR+CD16+CD56-				non-B non-T	HLA-DR+ activated NK cells (CD16+ CD56-)
	63	CD45	singlets	Live	non-B non-T	HLA-DR+CD16+CD56+				non-B non-T	HLA-DR+ activated NK cells (CD16+ CD56+)
	64	CD45	singlets	Live	non-B non-T	HLA-DR+CD16-CD56+				non-B non-T	HLA-DR+ activated NK cells (CD16- CD56+)
	65	CD45	singlets	Live	non-B non-T	HLA-DR+CD16-CD56-	CD11c+ CD123-			CD16- CD56- HLA-DR+	myeloid DC
	66	CD45	singlets	Live	non-B non-T	HLA-DR+CD16-CD56-	CD11c- CD123+			CD16- CD56- HLA-DR+	plasmacytoid DC
	70	CD45	singlets	MON	CD14+ Lineage-	CD14+ CD16dim				CD14+ Lineage-	intermediate monocytes
	71	CD45	singlets	Live	non-B non-T	HLA-DR+CD16-CD56-				non-B non-T	HLA-DR+ activated CD16- CD56- cells
T helper	1.2	CD45	singlets	Live	LYM	CD3				LYM	CD3 T-cells
	2.2	CD45	singlets	Live	LYM	CD3	CD4+ CD8+			CD3	DPT
	3.2	CD45	singlets	Live	LYM	CD3	CD4- CD8-			CD3	DNT
	4.2	CD45	singlets	Live	LYM	CD3	CD4+			CD3	T-helper
	5.2	CD45	singlets	Live	LYM	CD3	CD4+	CD38+ HLA-DR+		CD4+	Activated T-helper (CD38+ HLA-DR+)
	6.2	CD45	singlets	Live	LYM	CD3	CD4+	CD38+		CD4+	Activated T-helper (CD38+)
	7.2	CD45	singlets	Live	LYM	CD3	CD4+	HLA-DR+		CD4+	Activated T-helper (HLA-DR+)
	14.2	CD45	singlets	Live	LYM	CD3	CD8+			CD3	T-C/S
	15.2	CD45	singlets	Live	LYM	CD3	CD8+	CD38+ HLA-DR+		CD8+	Activated T-C/S (CD38+ HLA-DR+)
	16.2	CD45	singlets	Live	LYM	CD3	CD8+	CD38+		CD8+	Activated T-C/S (CD38+)
	17.2	CD45	singlets	Live	LYM	CD3	CD8+	HLA-DR+		CD8+	Activated T-C/S (DR+)
	24	CD45	singlets	Live	LYM	CD3	CD4+	CXCR5+		CD4+	T-helper (CXCR5+)
	25	CD45	singlets	Live	LYM	CD3	CD4+	CXCR3+ CCR6-		CD4+	Th1 (CXCR3+ CCR6-)
	26	CD45	singlets	Live	LYM	CD3	CD4+	CXCR3- CCR6-		CD4+	Th2 (CXCR3- CCR6-)
	27	CD45	singlets	Live	LYM	CD3	CD4+	CXCR3- CCR6+		CD4+	Th17 (CXCR3- CCR6+)
	28	CD45	singlets	Live	LYM	CD3	CD8+	CXCR5+		CD8+	T-C/S (CXCR5+)
	29	CD45	singlets	Live	LYM	CD3	CD8+	CXCR3+ CCR6-		CD8+	T-C/S (CXCR3+ CCR6-)
	30	CD45	singlets	Live	LYM	CD3	CD8+	CXCR3- CCR6-		CD8+	T-C/S (CXCR3- CCR6-)
	31	CD45	singlets	Live	LYM	CD3	CD8+	CXCR3- CCR6+		CD8+	T-C/S (CXCR3- CCR6+)
	72	CD45	singlets	Live	LYM	CD3	CD4+	CXCR5+ CXCR3+ CCR6-		CD4+	Tfh1 (CXCR5+ CXCR3+ CCR6-)
	73	CD45	singlets	Live	LYM	CD3	CD4+	CXCR5+ CXCR3- CCR6-		CD4+	Tfh2 (CXCR5+ CXCR3- CCR6-)
	74	CD45	singlets	Live	LYM	CD3	CD4+	CXCR5+ CXCR3- CCR6+		CD4+	Tfh17 (CXCR5+ CXCR3- CCR6+)
	75	CD45	singlets	Live	LYM	CD3	CD4+	CXCR5+ CXCR3+ CCR6+		CD4+	Tfh1_17 (CXCR5+ CXCR3+ CCR6+)
	76	CD45	singlets	Live	LYM	CD3	CD4+	CXCR5+ CXCR3+ CCR6-	CD38+ HLA-DR+	CD4+	CD38+ HLA-DR+ activated Tfh1 (CXCR5+ CXCR3+ CCR6-)
	77	CD45	singlets	Live	LYM	CD3	CD4+	CXCR5+ CXCR3- CCR6-	CD38+ HLA-DR+	CD4+	CD38+ HLA-DR+ activated Tfh2 (CXCR5+ CXCR3- CCR6-)
	78	CD45	singlets	Live	LYM	CD3	CD4+	CXCR5+ CXCR3- CCR6+	CD38+ HLA-DR+	CD4+	CD38+ HLA-DR+ activated Tfh17 (CXCR5+ CXCR3- CCR6+)
	79	CD45	singlets	Live	LYM	CD3	CD4+	CXCR5+ CXCR3+ CCR6+	CD38+ HLA-DR+	CD4+	CD38+ HLA-DR+ activated Tfh1_17 (CXCR5+ CXCR3+ CCR6+)

## Sheet: Supplementary File 1C
Gene	FDR P value
ANKRD22	2.3443e-88
CXCL10	1.06918e-69
GBP1P1	5.61643e-68
SERPING1	4.45913e-67
GBP1	1.32873e-55
ETV7	1.41445e-53
APOL4	1.50354e-53
BATF2	1.0943e-49
IDO1	4.34743e-49
LAP3	1.29912e-48
FCGR1B	2.69303e-46
SAMD4A	2.69303e-46
IFIT3	1.90302e-45
FCGR1A	2.55483e-43
WARS	2.55483e-43
IFIT2	5.52704e-42
GBP4	7.27283e-42
FCGR1C	3.38133e-41
STAT1	4.91891e-41
PARP9	2.35163e-40

## Sheet: Supplementary File 1D
Cell Type	FDR P value
Activated NK (CD16+CD56-DR+)	7.52e-06
CD56-CD16-	2.53e-05
Th1 CD3CD4+CD8-	3.57e-05
Monocytes CD14+	7.37e-05
Lymphocyte	8.27e-05
Monocyte	8.27e-05
Activated B cell (CD27-IgD-CD8+)	0.000157804
Activated NK cell CD16+CD56+DR+	0.00016936
Tcl CXCR3-CCR6-	0.00110771
plasmablast B-cells CD19+ CD20-	0.00110771
Th17 CD4+CD8-CXCR3-CCR6+	0.00206363
Th17 CXCR3-CCR6+	0.00206363
Tfh CCR6-CXCRR3CD4+	0.00206363
Activated T helper cell DR+CD39+	0.0033169
Tc2 CXCR3-CCR6-	0.00447571
Activated memory Treg DR+	0.00692622
CD19+CD20- B cell	0.0125614
D38+ HLADR+ ofCD4	0.0154811
Activated T helper DR+	0.0163273
CD38+HLADR+ of TH2	0.0180788

## Sheet: Supplementary File 1E
HSV1-/HSV2-			HSV1+/HSV2-			HSV1±/HSV2+
Cell type	FDR P value		Cell type	FDR P value		Cell type	FDR P value
Monocytes CD14+	0.0299072		Activated NK CD56+CD16-	0.00213623		Activated NK cell CD16+CD56+DR+	0.0213623
Activated NK cell CD16+CD56+DR+	0.0299072		Activated NK (CD16+CD56-DR+)	0.00213623		Thl 7 CD4+CD8-CXCR3-CCR6+	0.0281982
Activated B cell (CD27-IgD-CD8+)	0.0335693					Monocytes CD14+	0.0281982
Plasmablast B cell CD19+CD20-	0.0335693					Activated NK (CD16+CD56-DR+)	0.0281982
Thl CD3CD4+CD8-	0.0335693					Intermediate Monocytes CD14+CD16+	0.0281982
Th17 CD4+CD8-CXCR3-CCR6+	0.0335693					Lymphocyte	0.0469971
Tc17 CXCR3-CCR6+	0.0335693					monocyte	0.0469971
monocyte	0.037384					NK cells CD16+CD56-	0.0469971
Tc1 CXCR3+CCR6-	0.0382961
lymphocyte	0.0410631

## Sheet: Supplementary File 1F
HSV1-/HSV2-			HSV1+/HSV2-			HSV1±/HSV2+
Cell type	FDR p value		Cell type	FDR p value		Cell type	FDR p value
Activated T-helper (CD38+ HLA-DR+)	0.028083		Th1 (CXCR3+ CCR6-)	0.00427246		monocytes	0.0299072
CD38+ HLA-DR+ activated Tfh1_17 (CXCR5+ CXCR3+ CCR6+)	0.028083		CD38+ HLA-DR+ activated Tfh1 (CXCR5+ CXCR3+ CCR6-)	0.0270589		lymphocytes	0.0356038
monocytes	0.028083		lymphocytes	0.0276734
Th17 (CXCR3- CCR6+)	0.0367432		T-C/S (CXCR3- CCR6-)	0.0276734
CD38+ HLA-DR+ activated Tfh1 (CXCR5+ CXCR3+ CCR6-)	0.0367432		Tfh1 (CXCR5+ CXCR3+ CCR6-)	0.0276734
Th1 (CXCR3+ CCR6-)	0.0498454		monocytes	0.0285997
